# Supplementary material for: Neolithic humans and dogs - transient reservoirs for Yersinia pestis
Source: Research Square preprint supplement (doi:10.21203/rs.3.rs-3745869/v1), 2023-12-20
Supplement: Supplementary file 1 [file 38b99d7f5d8f7141f6f02822.xlsx]

## Sheet: TableS1
Table S1. Yersinia pestis-positive Warburg individuals: General information on the sample material and mapping statistics (mapping to hg19 and Yersinia pestis CO92)
				hg19										Yersinia pestis CO92
Sample	Skeletal element	Age	Calibrated radiocarbon dates with the 2-sigma range (lab number)	Gallery grave	Reads generated	genetic Sex	SNPs_1240K	SNPs_600K	MT haplogroup	Y haplogroup	DMG_1st_Base_5p_(%)	DMG_2nd_Base_5p_(%)	DMG_3rd_Base_5p_(%)	DMG_1st_Base_3p_(%)	DMG_2nd_Base_3p_(%)	DMG_3rd_Base_3p_(%)	Reads mapping Y. pestis chromosome NC_003143.1	Reads mapping Y. pestis plasmid pMT1 NC_003134.1	Reads mapping Y. pestis plasmid pPCP1 NC_003132.1	Reads mapping Y. pestis plasmid pCD1 NC_003131.1	endogenous DNA (%)	cov>=1x_(%)	cov>=2x_(%)	cov>=3x_(%)	cov>=4x_(%)	Cluster factor	DMG_1st_Base_5p_(%)	DMG_2nd_Base_5p_(%)	DMG_3rd_Base_5p_(%)	DMG_1st_Base_3p_(%)	DMG_2nd_Base_3p_(%)	DMG_3rd_Base_3p_(%)
Warburg_1	tooth	adult	5291-4979 (KIA-55519)	Warburg I	315,798,567	M	1,039,979	514.272	K1a	BT	0.134	0.0176207	0.010215	0.130341	0.0172948	0.009947	340021	3081	2347	12718	0.0348271	59.6326	17.4482	9.07477	4.85017	1.50655	11.8	1.35659	1.05441	11.369	1.46304	1.06212
Warburg_2	tooth	adult	5265-4857 (KIA-56332)	Warburg III	407,857,327	F	571.282	296.627	J2b1a	NA	0.113	0.0146994	0.00921603	0.111229	0.0145933	0.0091106	3090021	38137	25344	70082	0.955343	99.4589	99.3565	99.3146	99.2573	1.13847	9.899	0.200942	0.139882	9.59326	0.22462	0.142276
