# Supplementary material for: Neolithic humans and dogs - transient reservoirs for Yersinia pestis
Source: Research Square preprint supplement (doi:10.21203/rs.3.rs-3745869/v1), 2023-12-20
Supplement: Supplementary file 2 [file 472432b1dbb1776e4e2f6f44.xlsx]

## Sheet: Table_S5
Table S5. Y. pestis genomes: Table of nonsense SNPs leading by STOP/START codon gain/loss. Only SNPs covered by at least 3 reads were considered
SNP position	Reference Base	SNP	SNP effect	Functional class	Codon change	Amino acid change	Gene name	Transcript	Gene function	Y. pseudotuberculosis	RV2039	Warburg_1	Warburg_2	Gök_2	RISE509	RK1001	VLI092	KNK001	GEN72	GRS004	Gyvakarai1	VEL003	I5884	KunilaII	GZL001	GZL002	1343UNTAL85	HOP001	HOP004	CHC004	6POST	HGC009	KLE031	KLE048	MIB054	RISE505	GRH001	KZL002
1650425	G	A	STOP_GAINED	NONSENSE	tgG/tgA	W/*	YPO1457	YPO1457	hydroxymethylglutaryl-coenzyme A synthase	.	.	N	.	N	A	A	A	A	A	A	A	A	A	A	A	A	A	A	A	A	A	A	A	A	A	A	A	A
2484435	G	A	STOP_GAINED	NONSENSE	Cag/Tag	Q/*	YPO2210	YPO2210	hypothetical protein	.	N	N	.	N	.	.	.	.	.	.	A	.	.	.	.	.	.	.	.	N	.	.	.	.	.	.	.	.
782745	C	A	STOP_GAINED	NONSENSE	tCa/tAa	S/*	flgB	YPO0722	flagellar basal-body rod protein FlgB	.	.	.	.	N	.	.	.	.	.	.	.	.	.	.	.	.	A	A	A	A	A	A	A	A	A	N	N	N
1509320	G	A	STOP_GAINED	NONSENSE	tGg/tAg	W/*	YPO1344	YPO1344	pseudo	.	N	.	.	N	.	.	.	.	.	.	N	.	.	.	.	.	.	.	.	A	N	A	A	A	A	A	A	A
81808	C	T	STOP_GAINED	NONSENSE	Cag/Tag	Q/*	YPO0072	YPO0072	bifunctional regulatory protein%2FDNA repair protein	.	.	.	.	N	.	.	.	.	.	.	.	.	.	.	.	.	.	.	.	N	T	T	T	T	T	T	N	T
1054838	T	C	START_LOST	NONSENSE	aTg/aCg	M/T	YPO0956	YPO0956	hydroxamate-type ferrisiderophore receptor	.	N	N	.	N	.	N	.	.	.	.	.	N	N	N	N	N	N	N	N	N	N	C	N	N	C	C	N	C
4514744	C	T	STOP_GAINED	NONSENSE	tGg/tAg	W/*	YPO4005	YPO4005	hemolysin activator protein	.	N	.	.	N	.	.	.	.	.	.	.	.	.	.	.	.	.	.	.	.	.	.	T	T	T	T	T	T
2089063	G	A	START_LOST	NONSENSE	atG/atA	M/I	fliZ	YPO1844	flagella biosynthesis protein FliZ	.	N	N	.	N	.	.	.	.	N	.	.	.	.	N	.	.	.	.	.	N	N	.	N	.	A	.	.	.
1348478	C	T	STOP_GAINED	NONSENSE	Cga/Tga	R/*	YPO1198	YPO1198	ABC transporter ATP-binding protein	.	N	.	.	.	.	.	.	.	.	.	.	.	.	N	.	.	.	.	.	.	.	.	.	.	.	T	T	T
1482031	C	T	STOP_GAINED	NONSENSE	Caa/Taa	Q/*	YPO1317	YPO1317	hypothetical protein	.	.	.	.	.	.	.	.	.	.	.	.	.	.	.	.	.	.	.	.	.	.	.	.	.	.	T	T	T
4060430	C	T	STOP_GAINED	NONSENSE	tgG/tgA	W/*	yghU	YPO3639	glutathione S-transferase YghU	.	.	.	.	N	.	N	.	.	.	.	.	.	.	.	.	.	.	.	.	.	.	.	.	.	.	T	.	.
3700404	C	T	STOP_GAINED	NONSENSE	tGg/tAg	W/*	YPO3318	YPO3318	sugar ABC transporter substrate-binding protein	.	.	.	.	.	.	.	.	.	.	.	.	.	.	.	.	.	.	.	.	.	.	.	.	.	.	.	.	.
2770317	C	T	STOP_GAINED	NONSENSE	Caa/Taa	Q/*	YPO2470	YPO2470	hypothetical protein	.	.	.	.	.	.	.	.	.	.	.	.	.	.	.	.	.	.	.	.	.	.	.	.	.	.	.	T	T
3806146	C	A	STOP_LOST	NONSENSE	tGa/tTa	*/L	hpt	YPO3408	hypoxanthine phosphoribosyltransferase	.	.	.	.	.	.	N	.	N	.	.	.	N	.	.	.	.	.	.	.	.	.	.	.	.	.	.	A	A
4036960	G	T	START_LOST	NONSENSE	ttG/ttT	L/F	YPO3619	YPO3619	AraC family transcriptional regulator	.	N	.	.	N	.	.	.	N	.	.	N	.	.	.	.	.	.	.	.	.	.	.	.	.	.	.	T	T
4590370	G	A	STOP_GAINED	NONSENSE	Caa/Taa	Q/*	yiaF	YPO4070	hypothetical protein	.	.	.	.	.	.	N	.	.	.	.	.	.	.	N	.	.	.	.	.	.	N	.	.	.	.	.	A	A
3314332	C	A	STOP_GAINED	NONSENSE	tgC/tgA	C/*	dmsA	YPO2965	dimethyl sulfoxide reductase subunit A	.	N	.	.	N	.	N	.	.	.	.	.	.	.	.	.	.	.	.	.	.	.	.	.	.	.	.	.	A
3422436	C	T	STOP_GAINED	NONSENSE	tgG/tgA	W/*	YPO3066	YPO3066	hypothetical protein	.	.	.	.	N	.	N	.	N	.	.	.	.	.	.	N	N	.	.	.	.	.	.	.	.	.	.	N	T
Number of pseudogenes:										0	0	0	0	0	1	1	1	1	1	1	2	1	1	1	1	1	2	2	2	3	3	5	5	5	7	8	9	13
