# Supplementary material for: Neolithic humans and dogs - transient reservoirs for Yersinia pestis
Source: Research Square preprint supplement (doi:10.21203/rs.3.rs-3745869/v1), 2023-12-20
Supplement: Supplementary file 3 [file 94849025a33303aa1a1e5ebe.xlsx]

## Sheet: TableS2
Table S2. Yersinia pestis-positive Warburg individuals: Kinship inference
NGS Relate2 results
ida	idb	nSites	J9	J8	J7	J6	J5	J4	J3	J2	J1	rab	Fa	Fb	theta	inbred_relatedness_1_2	inbred_relatedness_2_1	fraternity	identity	zygosity	2of3_IDB	F_diff_a_b	loglh	nIter	bestoptimll	coverage	2dsfs	R0	R1	KING	2dsfs_loglike	2dsfsf_niter
Warburg_1	Warburg_2	1673399	1	0	0	0	0	0	0	0	0	0	0	0	0	0	0	0	0	0	0	0	-2.78387e+06	69	-2.78387e+06	0.854525	6.990338e-46,1.322149e-01,2.460341e-02,4.909950e-01,3.521738e-01,8.343347e-09,1.283215e-05,1.296839e-11,6.046489e-50	0.069898	0.543624	0.228194	-2.00218e+06	22
READ results
Sample1	Sample2	Relationship	Z_upper	Z_lower
Warburg_1	Warburg_2	Unrelated	NA	-15.8173
Pairwise mismatches
ID1	ID2	nSNPs	nmismatch	pmismatch
Warburg_1	Warburg_2	481359	122123	0.2537
