# Supplementary material for: Neolithic humans and dogs - transient reservoirs for Yersinia pestis
Source: Research Square preprint supplement (doi:10.21203/rs.3.rs-3745869/v1), 2023-12-20
Supplement: Supplementary file 4 [file a1bdf471fb90489100030e76.xlsx]

## Sheet: TableS3
Table S3. Yersinia pestis-positive Warburg individuals: Analysis of genomic ancestry components using qpADM
target	rank	tail_probability	chisquare	feasibility	source1	source1_proportion	source1_stderr	source2	source2_proportion	source2_stderr	source3	source3_proportion	source3_stderr
Warburg_1	2	0.796119	3.857		Germany_EN_LBK	0.677	0.098	Croatia_Mesolithic_HG	0.323	0.098	..	..	..
Warburg_2	2	0.447337	6.825		Germany_EN_LBK	0.721	0.115	Croatia_Mesolithic_HG	0.279	0.115	..	..	..
Warburg_1	2	0.884272	3.008		Germany_EN_LBK	0.383	0.159	Germany_Blatterhohle_MN	0.617	0.159	..	..	..
Warburg_2	2	0.087758	12.413		Germany_EN_LBK	0.742	0.222	Germany_Blatterhohle_MN	0.258	0.222	..	..	..
K19SK41	2	0.123725	11.359	infeasible	Germany_EN_LBK	0.156	0.878	Germany_MN_Baalberge	0.844	0.878	..	..	..
K82150	2	0.192775	9.927	infeasible	Germany_EN_LBK	0.282	1.15	Germany_MN_Baalberge	0.718	1.15	..	..	..
Warburg_1	2	0.604093	5.459		Germany_EN_LBK	0.679	0.084	Hungary_EN_HG_Koros	0.321	0.084	..	..	..
Warburg_2	2	0.577037	5.684		Germany_EN_LBK	0.729	0.095	Hungary_EN_HG_Koros	0.271	0.095	..	..	..
Warburg_1	2	0.250908	9.024		Germany_EN_LBK	0.753	0.083	Italy_North_Villabruna_HG	0.247	0.083	..	..	..
Warburg_2	2	0.17873	10.178		Germany_EN_LBK	0.793	0.093	Italy_North_Villabruna_HG	0.207	0.093	..	..	..
Warburg_1	2	0.428096	7.008		Germany_EN_LBK	0.751	0.257	Italy_Sicily_HG_OrienteC	0.249	0.257	..	..	..
K19SK41	2	0.923553	2.547	infeasible	Germany_EN_LBK	1.514	0.309	Italy_Sicily_HG_OrienteC	-0.514	0.309	..	..	..
Warburg_1	2	0.557094	5.852		Germany_EN_LBK	0.773	0.059	Latvia_HG.SG	0.227	0.059	..	..	..
Warburg_2	2	0.214515	9.566		Germany_EN_LBK	0.845	0.069	Latvia_HG.SG	0.155	0.069	..	..	..
Warburg_1	2	0.722829	4.482		Germany_EN_LBK	0.776	0.076	Lithuania_Mesolithic	0.224	0.076	..	..	..
Warburg_2	2	0.112303	11.66		Germany_EN_LBK	0.818	0.096	Lithuania_Mesolithic	0.182	0.096	..	..	..
Warburg_1	2	0.406588	7.218		Germany_EN_LBK	0.736	0.071	Luxembourg_Loschbour_published.DG	0.264	0.071	..	..	..
Warburg_2	2	0.187249	10.023		Germany_EN_LBK	0.8	0.089	Luxembourg_Loschbour_published.DG	0.2	0.089	..	..	..
Warburg_1	2	0.660201	4.998		Germany_EN_LBK	0.7	0.073	Romania_IronGates_Mesolithic.SG	0.3	0.073	..	..	..
Warburg_2	2	0.179829	10.157		Germany_EN_LBK	0.812	0.079	Romania_IronGates_Mesolithic.SG	0.188	0.079	..	..	..
Warburg_1	2	0.586276	5.607		Germany_EN_LBK	0.706	0.072	Serbia_IronGates_Mesolithic	0.294	0.072	..	..	..
Warburg_2	2	0.238587	9.2		Germany_EN_LBK	0.793	0.079	Serbia_IronGates_Mesolithic	0.207	0.079	..	..	..
Warburg_1	2	0.188819	9.996		Germany_EN_LBK	0.77	0.092	Spain_ElMiron	0.23	0.092	..	..	..
Warburg_2	2	0.072693	12.976		Germany_EN_LBK	0.892	0.109	Spain_ElMiron	0.108	0.109	..	..	..
Warburg_1	2	0.126368	11.292		Germany_EN_LBK	0.745	0.08	Spain_HG.SG	0.255	0.08	..	..	..
Warburg_2	2	0.153199	10.68		Germany_EN_LBK	0.779	0.095	Spain_HG.SG	0.221	0.095	..	..	..
Warburg_1	2	0.204929	9.721		Germany_EN_LBK	0.743	0.08	Switzerland_Bichon.SG	0.257	0.08	..	..	..
Warburg_2	2	0.187305	10.022		Germany_EN_LBK	0.786	0.098	Switzerland_Bichon.SG	0.214	0.098	..	..	..
