# Supplementary material for: Neolithic humans and dogs - transient reservoirs for Yersinia pestis
Source: Research Square preprint supplement (doi:10.21203/rs.3.rs-3745869/v1), 2023-12-20
Supplement: Supplementary file 5 [file b3adae76296ccc98a0a840b9.docx]

**Supplemental Information for**

**Neolithic humans and dogs - transient reservoirs for *Yersinia pestis***

Julian Susat1, Magdalena Haller1, Joanna H. Bonczarowska1, Nicolas da Silva1, Kerstin Schierhold2, Michael M. Rind2, Ulrich Schmölcke3, Wiebke Kirleis4, Christoph Rinne4, Johannes Müller4, Almut Nebel1, Ben Krause-Kyora1*

1Institute of Clinical Molecular Biology, Kiel University, Kiel, Germany

2LWL-Archäologie für Westfalen, Münster, Germany

3Centre for Baltic and Scandinavian Archaeology (ZBSA), Schloss Gottorf, Schleswig, Germany

4Institute of Pre- and Protohistoric Archaeology, Kiel University, Kiel, Germany

*Correspondence: b.krause-kyora@ikmb.uni-kiel.de

**Table S4.** Mapping statistics for the *Y. pestis*-positive samples.Overview ofstatistics after mapping to the chromosome and plasmids of the *Y. pestis* reference genome.

| Sample | Mapping reads | Cov 1x (%) | Cov 2x (%) | Cov 3x (%) | Mean coverage |
| --- | --- | --- | --- | --- | --- |
| **chromosome NC_003143.1** | | | | | |
| Warburg_1 | 340,021 | 89.45 | 76.32 | 58.09 | 3.22X |
| Warburg_2 | 3,090,021 | 94.84 | 94.68 | 94.58 | 28.89X |
| C90 | 31,549 | 8.42 |  |  | 0.31X |
| **pMT1 NC_003134.1** | | | | | |
| Warburg_1 | 3,081 | 57.52 | 33.57 | 16.49 | 1.5X |
| Warburg_2 | 38,137 | 74.55 | 73.04 | 72.67 | 17.03X |
| C90 | 187 | 6.04 |  |  | 0.07X |
| **pPCP1 NC_003132.1** | | | | | |
| Warburg_1 | 2,347 | 79.85 | 79.80 | 79.67 | 11.34X |
| Warburg_2 | 25,344 | 80.28 | 80.20 | 80.19 | 117.31X |
| C90 | 63 | 20.92 |  |  | 0.26X |
| **pCD1 NC_003131.1** | | | | | |
| Warburg_1 | 12,718 | 92.14 | 90.62 | 88.44 | 8.38X |
| Warburg_2 | 70,082 | 92.86 | 92.33 | 92.09 | 43.96X |
| C90 | 263 | 12.45 |  |  | 0.14X |


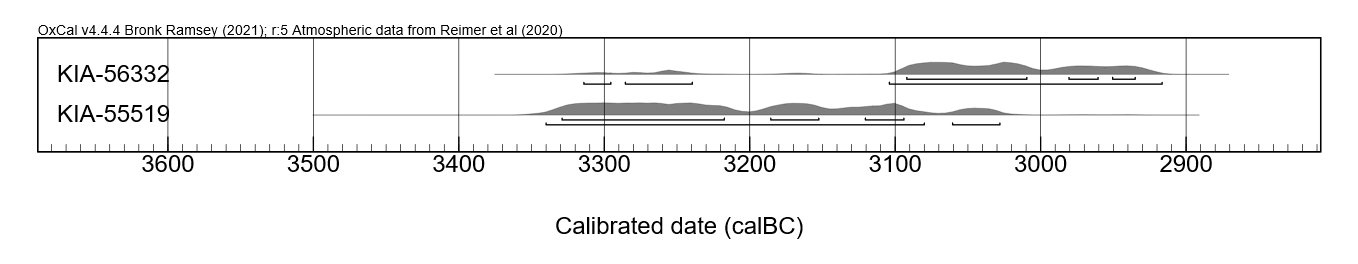


**Figure S1.** Radiocarbon dating results for Warburg_1 (KIA-55519) and Warburg_2 (KIA-56332).

**Figure S2.** Genomic ancestry components using unsupervised ADMIXTURE. For the two Warburg individuals (red), most models indicate two major genetic components: one maximized in Western hunter-gatherers (i.e., Luxembourg_Loschbour) and the other in Anatolian farmers (i.e., Turkey_N).


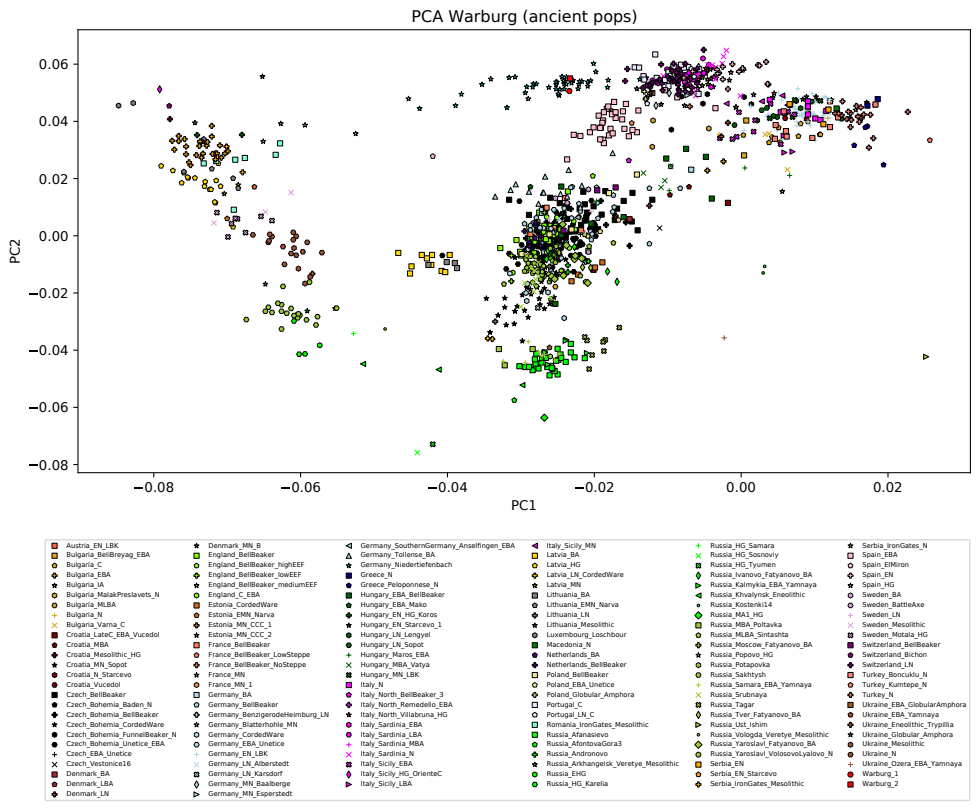


**Figure S3.** Principal component analysis of the individuals Warburg_1 and Warburg_2 buried in the WBC gallery graves of Warburg (red) in the context of 150 prehistoric populations, including individuals from the WBC gallery grave of Niedertiefenbach (blue stars).


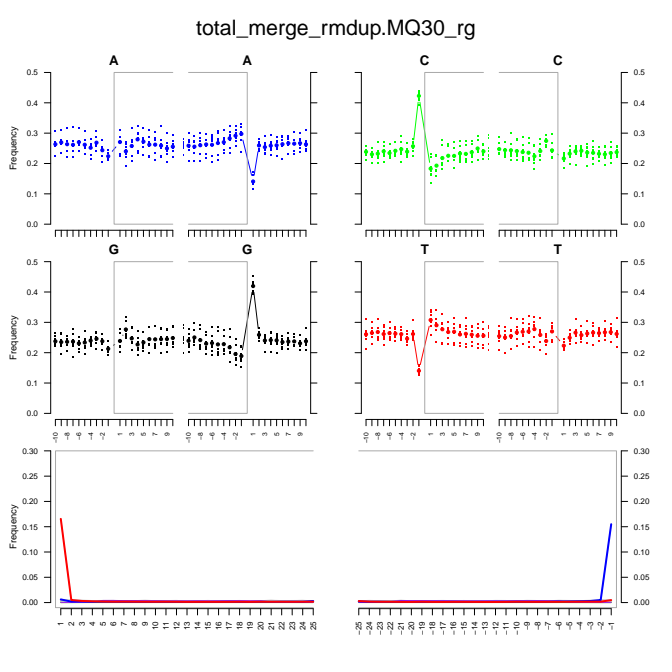


**Figure S4.** Damage plots supporting the ancient origin of *Y. pestis* reads for Warburg_1.


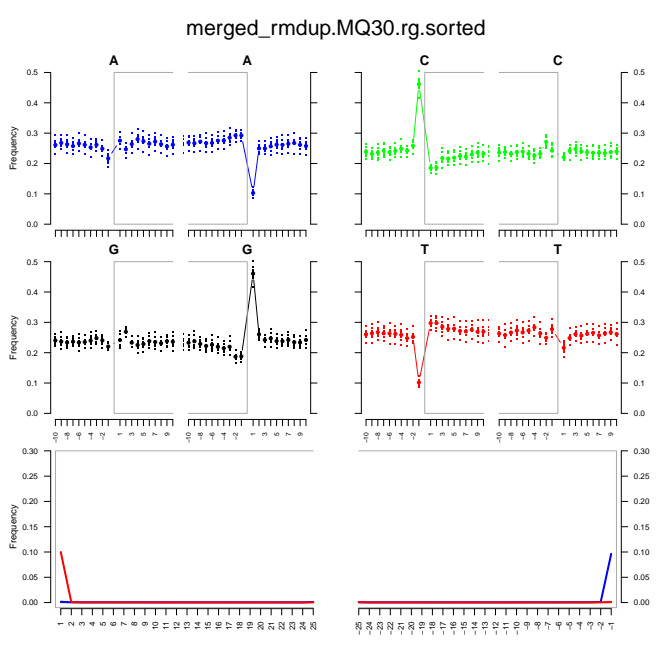
**Figure S5.** Damage plots supporting the ancient origin of *Y. pestis* reads for Warburg_2.

**Figure S6.** Visualization of virulence factors in ancient *Y. pestis* strains. Heatmap shows the presence or absence of 159 virulence factors on the chromosome (n=115) and the plasmids pCD1 (n=37), pMT1 (n=6) and pPCP1 (n=1). Genomes are sorted according to their placement in the phylogenetic tree.


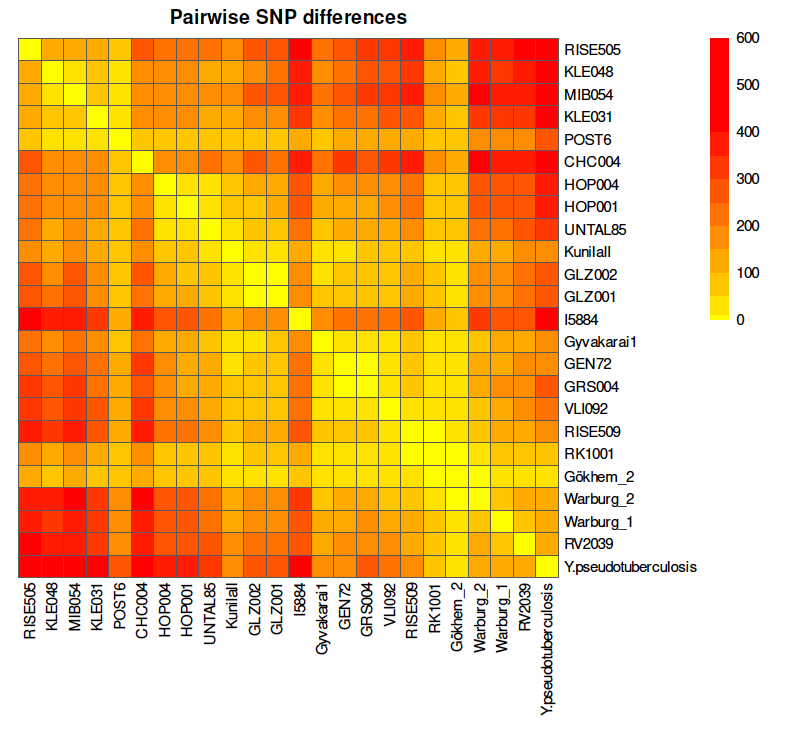


**Figure S7.** SNP distance matrix of LNBA and LN strains based on the Fasta alignments.
