# Supplementary material for: Neolithic humans and dogs - transient reservoirs for Yersinia pestis
Source: Research Square preprint supplement (doi:10.21203/rs.3.rs-3745869/v1), 2023-12-20
Supplement: Supplementary file 6 [file d55fb852eab1a4b1d136266b.xlsx]

## Sheet: TableS6_phylogeny
Table S6. 226 modern and 64 ancient strains used in the SNP-based phylogeny, with Y. pseudotuberculosis strain ATCC 6904 (NZ_CP008943.1) as outgroup.
Modern
Strain ID	Date BP	Accession No.	Origin	Publication
0.ANT1a_42013	0	ADPG00000000	China	Cui et. al., 2013
0.ANT1b_CMCC49003	0	ADQX00000000	China	Cui et. al., 2013
0.ANT1c_945	0	ADPV00000000	China	Cui et. al., 2013
0.ANT1c_945	0	ADPV00000000	China	Cui et. al., 2013
0.ANT1d_164	0	ADOW00000000	China	Cui et. al., 2013
0.ANT1d_164	0	ADOW00000000	China	Cui et. al., 2013
0.ANT1e_CMCC8211	0	ADRD00000000	China	Cui et. al., 2013
0.ANT1e_CMCC8211	0	ADRD00000000	China	Cui et. al., 2013
0.ANT1f_42095	0	ADPJ00000000	China	Cui et. al., 2013
0.ANT1g_CMCC42007	0	ADQV00000000	China	Cui et. al., 2013
0.ANT1h_CMCC43032	0	ADPG00000000	China	Cui et. al., 2013
0.ANT2_B42003004	0	AAYU00000000	China	Cui et. al., 2013
0.ANT2a_2330	0	ADOY00000000	China	Cui et. al., 2013
0.ANT3_231	0	JMUF00000000	Former Soviet Union	Eroshenko et. al., 2017
0.ANT3_790	0	CP006806	Former Soviet Union	Zhgenti et. al., 2015
0.ANT3_A-1486	0	LYMP	Former Soviet Union	Eroshenko et. al., 2017
0.ANT3a_CMCC38001	0	ADQU00000000	China	Cui et. al., 2013
0.ANT3b_A1956001	0	ADPX00000000	China	Cui et. al., 2013
0.ANT3c_42082	0	ADPH00000000	China	Cui et. al., 2013
0.ANT3d_CMCC21106	0	ADQP00000000	China	Cui et. al., 2013
0.ANT3e_42091b	0	ADPI00000000	China	Cui et. al., 2013
0.ANT5_A-1691	0	LYMQ	Former Soviet Union	Eroshenko et. al., 2017
0.ANT5_A-1836	0	LYOL00000000	Former Soviet Union	Eroshenko et. al., 2017
0.PE2_1412	0	CP006783	Former Soviet Union	Zhgenti et. al., 2015
0.PE2_1413	0	CP006762	Former Soviet Union	Zhgenti et. al., 2015
0.PE2_14735	0	AYLS00000000	Former Soviet Union	Zhgenti et. al., 2015
0.PE2_1522	0	CP006758	Former Soviet Union	Zhgenti et. al., 2015
0.PE2_1670	0	CP006806	Former Soviet Union	Zhgenti et. al., 2015
0.PE2_3067	0	CP006754	Former Soviet Union	Zhgenti et. al., 2015
0.PE2_3544	0	LZNH	Former Soviet Union	Zhgenti et. al., 2015
0.PE2_3551	0	MBSJ00000000	Former Soviet Union	Zhgenti et. al., 2015
0.PE2_3770	0	CP006751	Former Soviet Union	Zhgenti et. al., 2015
0.PE2_8787	0	CP006748	Former Soviet Union	Zhgenti et. al., 2015
0.PE2_C-197	0	LIYX	Former Soviet Union	Kislichkina et. al., 2015
0.PE2_C-235	0	LIYY	Former Soviet Union	Kislichkina et. al., 2015
0.PE2_C-267	0	LIYZ	Former Soviet Union	Kislichkina et. al., 2015
0.PE2_C-290	0	LIYU	Former Soviet Union	Kislichkina et. al., 2015
0.PE2_C-291	0	LIZC	Former Soviet Union	Kislichkina et. al., 2015
0.PE2_C-346	0	LIZE	Former Soviet Union	Kislichkina et. al., 2015
0.PE2_C-359	0	LIZB	Former Soviet Union	Kislichkina et. al., 2015
0.PE2_C-370	0	MIDX00000000	Former Soviet Union	Kislichkina et. al., 2017
0.PE2_C-535	0	MIDY00000000	Former Soviet Union	Kislichkina et. al., 2017
0.PE2_C-537	0	LIYP	Former Soviet Union	Kislichkina et. al., 2015
0.PE2_C-590	0	LIYQ	Former Soviet Union	Kislichkina et. al., 2015
0.PE2_C-666	0	LIZF	Former Soviet Union	Kislichkina et. al., 2015
0.PE2_C-678	0	MIDZ00000000	Former Soviet Union	Kislichkina et. al., 2017
0.PE2_C-700	0	MIEA00000000	Former Soviet Union	Kislichkina et. al., 2017
0.PE2_C-712	0	MTZW00000000	Former Soviet Union	Kislichkina et. al., 2017
0.PE2_C-739	0	MTZX00000000	Former Soviet Union	Kislichkina et. al., 2017
0.PE2_C-741	0	LPTX	Former Soviet Union	Kutyrev et. al., 2018
0.PE2_C-746	0	MTZY00000000	Former Soviet Union	Kislichkina et. al., 2017
0.PE2_C-824	0	MTZZ00000000	Former Soviet Union	Kislichkina et. al., 2017
0.PE2_KM874	0	LZTG	Former Soviet Union	Kutyrev et. al., 2018
0.PE2_M-986	0	LYMO	Former Soviet Union	Kutyrev et. al., 2018
0.PE2b_G8786	0	ADSG00000000	Former Soviet Union	Cui et. al., 2013
0.PE4_5307-Gis	0	LIYS	Former Soviet Union	Kislichkina et. al., 2015
0.PE4_A-1804	0	LIYW	Former Soviet Union	Kislichkina et. al., 2015
0.PE4_A-1807	0	LIYT	Former Soviet Union	Kislichkina et. al., 2015
0.PE4_A-513	0	LIZA	Former Soviet Union	Kislichkina et. al., 2015
0.PE4_I-3134	0	LIYR	Former Soviet Union	Kislichkina et. al., 2015
0.PE4_I-3442	0	NHYH00000000	Former Soviet Union	Kislichkina et. al., 2018a
0.PE4_I-3443	0	MIED00000000	Former Soviet Union	Kislichkina et. al., 2018a
0.PE4_I-3446	0	NHYI00000000	Former Soviet Union	Kislichkina et. al., 2018a
0.PE4_I-3447	0	MIEE00000000	Former Soviet Union	Kislichkina et. al., 2018a
0.PE4_I-3455	0	LIYV	Former Soviet Union	Kislichkina et. al., 2015
0.PE4_I-3515	0	NHYJ00000000	Former Soviet Union	Kislichkina et. al., 2018a
0.PE4_I-3516	0	NHMW00000000	Former Soviet Union	Kislichkina et. al., 2018a
0.PE4_I-3517	0	NHMX00000000	Former Soviet Union	Kislichkina et. al., 2018a
0.PE4_I-3518	0	NHMY00000000	Former Soviet Union	Kislichkina et. al., 2018a
0.PE4_I-3519	0	NHMZ00000000	Former Soviet Union	Kislichkina et. al., 2018a
0.PE4_M0000002	0	ADST00000000	China	Cui et. al., 2013
0.PE4_Microtus91001	0	NC_005810	China	Cui et. al., 2013
0.PE4a_B1313	0	LYMS	Former Soviet Union	Kutyrev et. al., 2018
0.PE4a_I-2751-55	0	LYCL00000000	Former Soviet Union	Kutyrev et. al., 2018
0.PE4a_I-2998	0	LYMR	Former Soviet Union	Kutyrev et. al., 2018
0.PE4Aa_12	0	ADOV00000000	China	Cui et. al., 2013
0.PE4Ab_9	0	ADPT00000000	China	Cui et. al., 2013
0.PE4Ba_PestoidesA	0	ACNT00000000	Former Soviet Union	Cui et. al., 2013
0.PE4Ca_CMCCN010025	0	ADRT00000000	China	Cui et. al., 2013
0.PE4Cc_CMCC18019	0	ADQO00000000	China	Cui et. al., 2013
0.PE4Cd_CMCC93014	0	ADRM00000000	China	Cui et. al., 2013
0.PE4Ce_CMCC91090	0	ADRJ00000000	China	Cui et. al., 2013
0.PE4h_A-1249	0	LYMN	Former Soviet Union	Eroshenko et. al., 2017
0.PE4m_I-3086	0	LZNY	Mongolia	Kutyrev et. al., 2018
0.PE4t_A-1815	0	LPTY	Former Soviet Union	Eroshenko et. al., 2017
0.PE5_I-2231	0	PVLX00000000	Mongolia	Kislichkina et. al., 2018b
0.PE5_I-2236	0	PVLZ00000000	Mongolia	Kislichkina et. al., 2018b
0.PE5_I-2239	0	LIZD	Mongolia	Kislichkina et. al., 2015
0.PE5_I-2422a	0	LIZG	Mongolia	Kislichkina et. al., 2015
0.PE5_I-2422b	0	QANK00000000	Mongolia	Kutyrev et. al., 2018
0.PE5_I-2457	0	PVMB00000000	Mongolia	Kislichkina et. al., 2018b
0.PE5_I-3189	0	LIYO	Mongolia	Kislichkina et. al., 2015
0.PE5_I-3190	0	PVLY00000000	Mongolia	Kislichkina et. al., 2018
0.PE7b_620024	0	ADPM00000000	China	Cui et. al., 2013
1.ANT1_Antiqua	0	NC_008150	Congo	Cui et. al., 2013
1.ANT1_UG05-0454	0	AAYR00000000	Uganda	Cui et. al., 2013
1.IN1a_CMCC11001	0	ADQK00000000	China	Cui et. al., 2013
1.IN1b_780441	0	ADPS00000000	China	Cui et. al., 2013
1.IN1c_K21985002	0	ADSS00000000	China	Cui et. al., 2013
1.IN2a_CMCC640047	0	ADRA00000000	China	Cui et. al., 2013
1.IN2b_30017	0	ADPC00000000	China	Cui et. al., 2013
1.IN2c_CMCC31004	0	ADQR00000000	China	Cui et. al., 2013
1.IN2d_C1975003	0	ADPZ00000000	China	Cui et. al., 2013
1.IN2e_C1989001	0	ADQB00000000	China	Cui et. al., 2013
1.IN2f_710317	0	ADPP00000000	China	Cui et. al., 2013
1.IN2g_CMCC05013	0	ADQF00000000	China	Cui et. al., 2013
1.IN2i_CMCC10012	0	ADQG00000000	China	Cui et. al., 2013
1.IN2j_CMCC27002	0	ADQQ00000000	China	Cui et. al., 2013
1.IN2k_970754	0	ADPW00000000	China	Cui et. al., 2013
1.IN2l_D1991004	0	ADRX00000000	China	Cui et. al., 2013
1.IN2m_D1964002b	0	ADRV00000000	China	Cui et. al., 2013
1.IN2n_CMCC02041	0	ADQC00000000	China	Cui et. al., 2013
1.IN2o_CMCC03001	0	ADQD00000000	China	Cui et. al., 2013
1.IN2p_D1982001	0	ADRW00000000	China	Cui et. al., 2013
1.IN2q_D1964001	0	ADRU00000000	China	Cui et. al., 2013
1.IN3a_F1954001	0	ADSC00000000	China	Cui et. al., 2013
1.IN3b_E1979001	0	AAYV00000000	China	Cui et. al., 2013
1.IN3c_CMCC84038b	0	ADRF00000000	China	Cui et. al., 2013
1.IN3d_YN1683	0	ADTD00000000	China	Cui et. al., 2013
1.IN3e_YN472	0	ADTH00000000	China	Cui et. al., 2013
1.IN3f_YN1065	0	ADTC00000000	China	Cui et. al., 2013
1.IN3g_E1977001	0	ADRY00000000	China	Cui et. al., 2013
1.IN3h_CMCC84033	0	ADRE00000000	China	Cui et. al., 2013
1.IN3i_CMCC84046	0	ADRG00000000	China	Cui et. al., 2013
1.ORI1_CA88	0	ABCD00000000	USA	Cui et. al., 2013
1.ORI1a_CMCC114001	0	ADQL00000000	China	Cui et. al., 2013
1.ORI1b_India195	0	ACNR00000000	India	Cui et. al., 2013
1.ORI1c_F1946001	0	ADSB00000000	China	Cui et. al., 2013
1.ORI2_F1991016	0	ABAT00000000	China	Cui et. al., 2013
1.ORI2a_YN2179	0	ADTE00000000	Myanmar	Cui et. al., 2013
1.ORI2c_YN2551b	0	ADTF00000000	China	Cui et. al., 2013
1.ORI2d_YN2588	0	ADTG00000000	China	Cui et. al., 2013
1.ORI2f_CMCC87001	0	ADRH00000000	China	Cui et. al., 2013
1.ORI2g_F1984001	0	ADSD00000000	China	Cui et. al., 2013
1.ORI2h_YN663	0	ADTI00000000	China	Cui et. al., 2013
1.ORI2i_CMCCK100001a	0	ADRR00000000	China	Cui et. al., 2013
1.ORI2i_CMCCK110001b	0	ADRS00000000	China	Cui et. al., 2013
1.ORI3_IP275	0	AAOS00000000	Madagascar	Cui et. al., 2013
1.ORI3_MG05-1020	0	AAYS00000000	Madagascar	Cui et. al., 2013
1.ORI3a_EV76	0	ADSA00000000	Madagascar	Cui et. al., 2013
2.ANT1_Nepal516	0	ACNQ00000000	Nepal	Cui et. al., 2013
2.ANT1a_34008	0	ADPD00000000	China	Cui et. al., 2013
2.ANT1b_34202	0	ADPE00000000	China	Cui et. al., 2013
2.ANT2a_2	0	ADOX00000000	China	Cui et. al., 2013
2.ANT2b_351001	0	ADPF00000000	China	Cui et. al., 2013
2.ANT2c_CMCC347001	0	ADQS00000000	China	Cui et. al., 2013
2.ANT2d_G1996006	0	ADSE00000000	China	Cui et. al., 2013
2.ANT2e_G1996010	0	ADSF00000000	China	Cui et. al., 2013
2.ANT2f_CMCC348002	0	ADQT00000000	China	Cui et. al., 2013
2.ANT3_KM682	0	LPVG	Former Soviet Union	Kutyrev et. al., 2018
2.ANT3a_CMCC92010	0	ADRL00000000	China	Cui et. al., 2013
2.ANT3b_CMCC95001	0	ADRN00000000	China	Cui et. al., 2013
2.ANT3c_CMCC96001	0	ADRO00000000	China	Cui et. al., 2013
2.ANT3d_CMCC96007	0	ADRP00000000	China	Cui et. al., 2013
2.ANT3e_CMCC67001	0	ADRB00000000	China	Cui et. al., 2013
2.ANT3f_CMCC104003	0	ADQH00000000	China	Cui et. al., 2013
2.ANT3g_CMCC51020	0	ADQY00000000	China	Cui et. al., 2013
2.ANT3h_CMCC106002	0	ADQI00000000	China	Cui et. al., 2013
2.ANT3i_CMCC64001	0	ADQZ00000000	China	Cui et. al., 2013
2.ANT3j_H1959004	0	ADSI00000000	China	Cui et. al., 2013
2.ANT3k_5761	0	ADPL00000000	Russia	Cui et. al., 2013
2.ANT3l_735	0	ADPR00000000	Russia	Cui et. al., 2013
2.MED0_C-627	0	MBSI00000000	Former Soviet Union	Kutyrev et. al., 2018
2.MED1_1045	0	CP006794	Former Soviet Union	Zhgenti et. al., 2015
2.MED1_1116-D	0	LPXS	Former Soviet Union	Kutyrev et. al., 2018
2.MED1_1240	0	LZNI	Former Soviet Union	Kutyrev et. al., 2018
2.MED1_173	0	LQAZ	Former Soviet Union	Kutyrev et. al., 2018
2.MED1_1906	0	LYOM	Former Soviet Union	Kutyrev et. al., 2018
2.MED1_244	0	LZND	Former Soviet Union	Kutyrev et. al., 2018
2.MED1_261	0	LZNG	Former Soviet Union	Kutyrev et. al., 2018
2.MED1_2944	0	CP006792	Former Soviet Union	Zhgenti et. al., 2015
2.MED1_44	0	LZNF	Former Soviet Union	Kutyrev et. al., 2018
2.MED1_A-1763	0	LQAW	Former Soviet Union	Kutyrev et. al., 2018
2.MED1_A-1809	0	LYMF	Former Soviet Union	Eroshenko et. al., 2017
2.MED1_A-1825	0	LYCM	Former Soviet Union	Kutyrev et. al., 2018
2.MED1_A-1920	0	LYCO	Former Soviet Union	Kutyrev et. al., 2018
2.MED1_C-791	0	LQAU	Former Soviet Union	Kutyrev et. al., 2018
2.MED1_K1973002	0	AAYT00000000	China	Cui et. al., 2013
2.MED1_KM816	0	LPXU	Former Soviet Union	Kutyrev et. al., 2018
2.MED1_KM918	0	LPQY	Former Soviet Union	Kutyrev et. al., 2018
2.MED1_M-1448	0	LYCN	Former Soviet Union	Kutyrev et. al., 2018
2.MED1_M-1453	0	LQAY	Former Soviet Union	Kutyrev et. al., 2018
2.MED1_M-1484	0	LQAV	Former Soviet Union	Kutyrev et. al., 2018
2.MED1_M-1524	0	LYCP	Former Soviet Union	Kutyrev et. al., 2018
2.MED1_M-1773	0	LYMG	Former Soviet Union	Kutyrev et. al., 2018
2.MED1_M-1864	0	LOHR	Former Soviet Union	Kutyrev et. al., 2018
2.MED1_M-519	0	LQAX	Former Soviet Union	Kutyrev et. al., 2018
2.MED1_M-549	0	LQBA	Former Soviet Union	Kutyrev et. al., 2018
2.MED1_M-595	0	LYOH	Former Soviet Union	Kutyrev et. al., 2018
2.MED1_M-978	0	LPXT	Former Soviet Union	Kutyrev et. al., 2018
2.MED1b_2506	0	ADPA00000000	China	Cui et. al., 2013
2.MED1c_2654	0	ADPB00000000	China	Cui et. al., 2013
2.MED1d_2504	0	ADOZ00000000	China	Cui et. al., 2013
2.MED2b_91	0	ADPU00000000	China	Cui et. al., 2013
2.MED2d_A1973001	0	ADPY00000000	China	Cui et. al., 2013
2.MED2e_7338	0	ADPQ00000000	China	Cui et. al., 2013
2.MED3a_J1963002	0	ADSP00000000	China	Cui et. al., 2013
2.MED3b_CMCC125002b	0	ADQN00000000	China	Cui et. al., 2013
2.MED3c_I1969003	0	ADSK00000000	China	Cui et. al., 2013
2.MED3d_J1978002	0	ADSQ00000000	China	Cui et. al., 2013
2.MED3f_I1970005	0	ADSL00000000	China	Cui et. al., 2013
2.MED3g_CMCC99103	0	ADRQ00000000	China	Cui et. al., 2013
2.MED3h_CMCC90027	0	ADRI00000000	China	Cui et. al., 2013
2.MED3i_CMCC92004	0	ADRK00000000	China	Cui et. al., 2013
2.MED3j_I2001001	0	ADSO00000000	China	Cui et. al., 2013
2.MED3k_CMCC12003	0	ADQM00000000	China	Cui et. al., 2013
2.MED3l_I1994006	0	ADSN00000000	China	Cui et. al., 2013
2.MED3m_SHAN11	0	ADTA00000000	China	Cui et. al., 2013
2.MED3n_SHAN12	0	ADTB00000000	China	Cui et. al., 2013
2.MED3o_I1991001	0	ADSM00000000	China	Cui et. al., 2013
2.MED3p_CMCC107004	0	ADQJ00000000	China	Cui et. al., 2013
3.ANT1b_CMCC71001	0	ADRC00000000	China	Cui et. al., 2013
3.ANT1c_C1976001	0	ADQA00000000	China	Cui et. al., 2013
3.ANT1d_71021	0	ADPO00000000	China	Cui et. al., 2013
3.ANT2a_MGJZ6	0	ADSX00000000	Mongolia	Cui et. al., 2013
3.ANT2b_MGJZ7	0	ADSY00000000	Mongolia	Cui et. al., 2013
3.ANT2c_MGJZ9	0	ADSZ00000000	Mongolia	Cui et. al., 2013
3.ANT2d_MGJZ11	0	ADSU00000000	Mongolia	Cui et. al., 2013
3.ANT2e_MGJZ3	0	ADSW00000000	Mongolia	Cui et. al., 2013
4.ANT_1454	0	LZNC	Former Soviet Union	Kutyrev et. al., 2018
4.ANT_338	0	LZNX	Former Soviet Union	Kutyrev et. al., 2018
4.ANT_517	0	LYMH	Former Soviet Union	Kutyrev et. al., 2018
4.ANT_KM932	0	LZNE	Former Soviet Union	Kutyrev et. al., 2018
4.ANT_M-1944	0	LYOK	Former Soviet Union	Kutyrev et. al., 2018
4.ANT1a_MGJZ12	0	ADSV00000000	Mongolia	Cui et. al., 2013
CO92	0	NC_003143.1	-	Parkhill et. al., 2001
Second plague pandemic
Strain ID	Date BP	Accession No.	Origin	Publication
Barcelona	590	PRJEB13664	Spain	Spyrou et. al., 2016
BED024	352	PRJEB29990	United Kingdom	Spyrou et. al., 2019
BED028	352	PRJEB29990	United Kingdom	Spyrou et. al., 2019
BED030	352	PRJEB29990	United Kingdom	Spyrou et. al., 2019
BED034	352	PRJEB29990	United Kingdom	Spyrou et. al., 2019
Bolgar	569	PRJEB13664	Russia	Spyrou et. al., 2016
BRA001	317	PRJEB29990	United Kingdom	Spyrou et. al., 2019
Ellwangen	394	PRJEB13664	Germany	Spyrou et. al., 2016
G488	350	PRJEB36413	Latvia	Susat et. al., 2020
G701	350	PRJEB36413	Latvia	Susat et al., 2020
LAI009	750	PRJEB29990	Republic of Tatarstan (Russia)	Spyrou et. al., 2019
London_EastSmithfield_6330	603	SAMN00715799	United Kingdom	Bos et. al., 2011
London_EastSmithfield_8124_8291_11972	603	SRR341961, SRR341962, SRR341963	United Kingdom	Bos et. al., 2011
MAN008	613	PRJEB29990	Germany	Spyrou et. al., 2019
NAB003	608	PRJEB29990	Germany	Spyrou et. al., 2019
NMS002	575	PRJEB29990	United Kingdom	Spyrou et. al., 2019
OBS107	229	PRJEB12163	France	Bos et. al., 2016
OBS110	229	PRJEB12163	France	Bos et. al., 2016
OBS116	229	PRJEB12163	France	Bos et. al., 2016
OBS124	229	PRJEB12163	France	Bos et. al., 2016
OBS137	229	PRJEB12163	France	Bos et. al., 2016
STA001	425	PRJEB29990	Germany	Spyrou et. al., 2019
STN002	390	PRJEB29990	Switzerland	Spyrou et. al., 2019
STN007	390	PRJEB29990	Switzerland	Spyrou et. al., 2019
STN008	390	PRJEB29990	Switzerland	Spyrou et. al., 2019
STN013	390	PRJEB29990	Switzerland	Spyrou et. al., 2019
STN014	390	PRJEB29990	Switzerland	Spyrou et. al., 2019
STN019	390	PRJEB29990	Switzerland	Spyrou et. al., 2019
STN020	390	PRJEB29990	Switzerland	Spyrou et. al., 2019
STN021	390	PRJEB29990	Switzerland	Spyrou et. al., 2019
Justinian plague
Strain ID	Date BP	Accession No.	Origin	Publication
Altenerding	1451	PRJEB14851	Germany	Feldman et. al., 2016
DA101	1770	PRJEB25891	Kyrgyzstan	Damgaard et. al., 2018
DIT003.B	1438	SAMEA5661360	Germany	Keller et. al., 2019
EDI001.A	1394	SAMEA5661363	United Kingdom	Keller et. al., 2019
LVC	1409	SAMEA5661382, SAMEA5661378, SAMEA5661380	France	Keller et. al., 2019
PET004.A	1433	SAMEA5661385	Germany	Keller et. al., 2019
UNT003.A	1434	SAMEA5661389	Germany	Keller et. al., 2019
VAL001.B	1429	SAMEA5661384	Spain	Keller et. al., 2019
LNBA
Strain ID	Date BP	Accession No.	Origin	Publication
1343UNTAL85	4203	ERS1892067	Germany	Valtuena et. al., 2017
6POST	3873	ERS1892066	Germany	Valtuena et. al., 2017
CHC004	3979	PRJEB51099	Poland	Valtuena et. al., 2022
GEN72	4712	ERS1892068	Croatia	Valtuena et. al., 2017
GRS004	4662	PRJEB51099	Germany	Valtuena et. al., 2022
Gyvakarai1	4485	ERS1892064	Lithuania	Valtuena et. al., 2017
GLZ001	4556	ERS4540520	Russia	Yu et al. 2020
GLZ002	4430	ERS4540521	Russia	Yu et al. 2020
HOP001	4278	PRJEB51099	Czech Republic	Valtuena et. al., 2022
HOP004	4250	PRJEB51099	Czech Republic	Valtuena et. al., 2022
I5884	4743	PRJEB51099	Ukraine	Valtuena et. al., 2022
KLE031	3839	PRJEB51099	Germany	Valtuena et. al., 2022
KLE048	3702	PRJEB51099	Germany	Valtuena et. al., 2022
Kunilall	4427	ERS1892065	Estonia	Valtuena et. al., 2017
KZL002	2596	PRJEB51099	Kazakhstan	Valtuena et. al., 2022
MIB054	3814	PRJEB51099	Czech Republic	Valtuena et. al., 2022
RISE505	3635	PRJEB10885	Russia	Rasmussen et. al., 2015
RISE509	4731	PRJEB10885	Russia	Rasmussen et. al., 2015
RK1001	4725	ERS1892069	Russia	Valtuena et. al., 2017
VLI092	4725	PRJEB51099	Czech Republic	Valtuena et. al., 2022
I2470	3160	PRJEB51099	Spain	Valtuena et. al., 2022
RT5	3750	PRJEB24296	Russia	Spyrou et. al., 2018
LN
Strain ID	Date BP	Accession No.	Origin	Publication
Gökhem2	4850	ERS434180	Sweden	Rascovan et. al., 2019
RV2039	5180	ERS6638365	Latvia	Susat et al. 2021
Warburg_1	5135	PRJEB49648	Germany	In this study
Warburg_2	5066	PRJEB49648	Germany	In this study
