# Supplementary material for: Neolithic humans and dogs - transient reservoirs for Yersinia pestis
Source: Research Square preprint supplement (doi:10.21203/rs.3.rs-3745869/v1), 2023-12-20
Supplement: Supplementary file 7 [file f825fc375678f9166c23ed84.xlsx]

## Sheet: TableS7_molecular_dating
Table S7. Subset of 42 strains used for molecular dating with BEAST2.
Strain ID	Dating BP	Accession No.	Origin	Publication
Y. pseudotuberculosis NCTC10275	0	NZ_CP008943.1	Turkey	Direct data submission
0.PE7b_620024	0	ADPM00000000	China	Cui et. al., 2013
0.PE4Aa_12	0	ADOV00000000	China	Cui et. al., 2013
0.PE4Ba_PestoidesA	0	ACNT00000000	FSU	Cui et. al., 2013
0.PE4Cc_CMCC18019	0	ADQO00000000	China	Cui et. al., 2013
0.ANT1e_CMCC8211	0	ADRD00000000	China	Cui et. al., 2013
0.ANT2a_2330	0	ADOY00000000	China	Cui et. al., 2013
0.ANT3e_42091b	0	ADPI00000000	China	Cui et. al., 2013
4.ANT1a_MGJZ12	0	ADSV00000000	Mongolia	Cui et. al., 2013
3.ANT2b_MGJZ7	0	ADSY00000000	Mongolia	Cui et. al., 2013
3.ANT1b_CMCC71001	0	ADRC00000000	China	Cui et. al., 2013
2.ANT3l_735	0	ADPR00000000	Russia	Cui et. al., 2013
2.ANT1a_34008	0	ADPD00000000	China	Cui et. al., 2013
2.MED3n_SHAN12	0	ADTB00000000	China	Cui et. al., 2013
2.MED1d_2504	0	ADOZ00000000	China	Cui et. al., 2013
2.MED2e_7338	0	ADPQ00000000	China	Cui et. al., 2013
1.ANT1_UG05-0454	0	AAYR00000000	Uganda	Cui et. al., 2013
1.IN1c_K21985002	0	ADSS00000000	China	Cui et. al., 2013
1.IN2l_D1991004	0	ADRX00000000	China	Cui et. al., 2013
1.IN3b_E1979001	0	AAYV00000000	China	Cui et. al., 2013
1.ORI2h_YN663	0	ADTI00000000	China	Cui et. al., 2013
1.ORI3_IP275	0	AAOS00000000	Madagascar	Cui et. al., 2013
2.ANT1b_34202	0	ADPE00000000	China	Cui et. al., 2013
3.ANT1c_C1976001	0	ADQA00000000	China	Cui et. al., 2013
CO92	0	NC_003143.1	-	Parkhill et. al., 2001
OBS107	229	PRJEB12163	France	Bos et. al., 2016
Ellwangen	394	PRJEB13664	Germany	Spyrou et. al., 2016
Bolgar	569	PRJEB13664	Russia	Spyrou et. al., 2016
Barcelona	590	PRJEB13664	Spain	Spyrou et. al., 2016
London_EastSmithfield_8124_8291_11972	603	SRR341961, SRR341962, SRR341963	United Kingdom	Bos et. al., 2011
Altenerding	1451	PRJEB14851	Germany	Feldman et. al., 2016
DA101	1770	PRJEB25891	Kyrgyzstan	Damgaard et. al., 2018
RISE505	3635	PRJEB10885	Russia	Rasmussen et. al., 2015
6POST	3873	ERS1892066	Germany	Valtuena et. al., 2017
1343UNTAL85	4203	ERS1892067	Germany	Valtuena et. al., 2017
Kunilall	4427	ERS1892065	Estonia	Valtuena et. al., 2017
Gyvakarai1	4485	ERS1892064	Lithuania	Valtuena et. al., 2017
RISE509	4731	PRJEB10885	Russia	Rasmussen et. al., 2015
Gökhem2	4850	ERS434180	Sweden	Rascovan et. al., 2019
Warburg_2	5066	PRJEB49648	Germany	In this study
Warburg_1	5135	PRJEB49648	Germany	In this study
RV2039	5180	ERS6638365	Latvia	Susat et al. 2021
